# Supplementary material for: Electronic Ni–N interaction enhanced reductive amination on an N-doped porous carbon supported Ni catalyst
Source: Royal Society of Chemistry journal article supplement (doi:10.1039/d2cy01551j), 2022-01-01
Supplement: d2cy01551j1.pdf [file d2cy01551j1.pdf]

**Electronic Supplementary Information (ESI) for:**

**Electronic Ni-N interaction enhanced reductive amination on N-doping porous carbon supported Ni catalyst**

*Wenjing Song,<sup>\*a</sup> Yujie Wan,<sup>a</sup> Yuefeng Li,<sup>c</sup> Xin Luo,<sup>a</sup> Weiping Fang,<sup>b</sup> Quanxing Zheng,<sup>c</sup> Pengfei Ma,<sup>c</sup> Jianping Zhang<sup>c</sup> and Weikun Lai<sup>\*b</sup>*

<sup>a</sup> Key Laboratory of Green Chemical Process of Ministry of Education, School of Chemical Engineering & Pharmacy, Wuhan Institute of Technology, Wuhan 430073, P. R. China. Email: songwenjing@wit.edu.cn.

<sup>b</sup> National Engineering Laboratory for Green Chemical Productions of Alcohols-ethers-esters, College of Chemistry and Chemical Engineering, Xiamen University, Xiamen 361005, P. R. China. Email: laiweikun@xmu.edu.cn

<sup>c</sup> Technology Center, China Tobacco Fujian Industrial Co., Ltd., Xiamen 361021, P. R. China.

**Filtration and leaching test.**

In order to confirm the heterogeneous nature of the catalyst system, we carried out a hot filtration test. After the reaction for 3 h, the autoclave was allowed to cool to room temperature and the excess gas was released, the catalyst was separated by filtration using PTFE membrane filter. 44.2% yield of furfuryl amine was achieved after analysing the reaction mixture by GC. Then, the catalytic reaction was continued for another 3 h with the filtrate under identical conditions. No noticeable improvement in furfuryl amine yield beyond 45.7% was observed.

After the filtration experiment, the filtrate was evaporated through rotary evaporator. The obtained product was dissolved and digested with  $\text{HNO}_3$  solution and  $\text{H}_2\text{O}_2$  solution. The resulting solution was cooled to room temperature followed by sonication. The solution was transferred into a 50 mL volumetric flask, diluted with deionized water, and the amount of Ni was measured by ICP-MS analysis. The ICP-MS analysis confirmed no obvious leaching of Ni took place in the filtrate, indicating the heterogeneous nature of this catalyst system.

**Table S1** Application of heterogeneous catalysts in catalytic ammonification.

| Type of C-O bond                       | Catalysts                                                          | Conditions                                                                                                                          | aminating agent                                                     | Yield (%)                                            | References |
|----------------------------------------|--------------------------------------------------------------------|-------------------------------------------------------------------------------------------------------------------------------------|---------------------------------------------------------------------|------------------------------------------------------|------------|
| <b>C=O</b>                             | 30 mg 6 mol % Ni@SiO <sub>2</sub> -800                             | 0.5 mmol 2-bromobenzaldehyde, 3 mL t-BuOH, 120 °C, 15 h                                                                             | 0.5-0.7 MPa NH <sub>3</sub> , 2 MPa H <sub>2</sub>                  | 96 %                                                 | 1          |
|                                        | 25 mg Co-Co <sub>3</sub> O <sub>4</sub> @C [3.5 mol % Co]          | 0.5 mmol aldehyde, 3 mL t-BuOH, 120 °C, 15 h                                                                                        | 0.5-0.7 MPa NH <sub>3</sub> , 4 MPa H <sub>2</sub>                  | 80~95 %                                              | 2          |
|                                        | 3.5 wt. % Ni/γ-Al <sub>2</sub> O <sub>3</sub>                      | 0.5 mmol benzaldehyde, 2.0 mL H <sub>2</sub> O, 80 °C, 20 h                                                                         | 0.5 mL NH <sub>3</sub> ·H <sub>2</sub> O 25 %, 1 MPa H <sub>2</sub> | 78 %                                                 | 3          |
|                                        | 0.2 mol % 5wt % RuTiP                                              | 1 mmol cyclohexanone, 2 mL methanol; 30 °C, 6 h, IS: n-butanol                                                                      | 0.6 MPa NH <sub>3</sub> , 1.4 MPa H <sub>2</sub>                    | 96 % cyclohexylamine                                 | 4          |
|                                        | 0.1 mol % 2 wt. % Pt/P-TiO <sub>2</sub>                            | 1 mmol LA, 1 mmol n-octylamine, 2 mL methanol, 1 h, rt                                                                              | hydrogen balloon                                                    | 61 % Pyrrolidone                                     | 5          |
|                                        | 0.02 g 1wt. % RuNb <sub>2</sub> O <sub>5</sub>                     | 0.5 mmol furfural, 5mL MeOH, 90 °C, 4 h. IS: PhCl                                                                                   | 0.1MPa NH <sub>3</sub> , 4 MPa H <sub>2</sub>                       | 99 % furfuryl amine                                  | 6          |
|                                        | 50 mg 5wt. % Ru/Al <sub>2</sub> O <sub>3</sub>                     | 6.6 mmol heptaldehyde, 0.58 mmol n-dodecane, MeOH (20 mL), 80 °C, 2 h                                                               | 0.4 MPa NH <sub>3</sub> , 3 MPa H <sub>2</sub>                      | 75 % furfuryl amine                                  | 7          |
|                                        | 0.5 g 1 wt. % Ru/Nb <sub>2</sub> O <sub>5</sub> ·nH <sub>2</sub> O | 15 mmol furfural, 80 mL MeOH, 70 °C, 6 h                                                                                            | 0.1 MPa NH <sub>3</sub> , 3 MPa H <sub>2</sub> ,                    | 89 % furfuryl amine                                  | 8          |
|                                        | 0.1 g 5 wt. % Ru/ZrO <sub>2</sub>                                  | 2 mmol glycolaldehyde, cat., 75 °C, 3 MPa H <sub>2</sub> , 12 h                                                                     | 2.0 mL 25 wt.% NH <sub>3</sub> ·H <sub>2</sub> O                    | 93 % ethanolamine                                    | 9          |
| <b>C<sub>Ar</sub>-O-C<sub>Ar</sub></b> | Pd (OH) <sub>2</sub> /C                                            | 0.2 mmol diphenyl ether, 20 mol % cat. 1 equiv HCO <sub>2</sub> Na, 1 mL m-xylene, 5ul H <sub>2</sub> O, 160 °C, Ar, 24 h           | 0.5 mmol Pyrrolidine                                                | 42 % 1-cyclohexylpyrrole<br>18 % 1-phenylpyrrolidine | 10         |
|                                        | Pd (OH) <sub>2</sub> /C                                            | 0.2 mmol diphenyl ether, 20 mol % cat. 1 equiv NaBH <sub>4</sub> , 1 mL m-xylene, 160 °C, Ar, 24 h                                  | 5 equiv NH <sub>3</sub> ·H <sub>2</sub> O                           | 83 % N-cyclohexyl aniline                            | 11         |
| <b>C<sub>Ar</sub>-OH</b>               | Pd/C                                                               | 0.2 mmol Phenol, 10 mol % cat. 50 mol % NaBH <sub>4</sub> , 40 mol % LiOH, 2 mL 1,4-dioxane, 4 Å molecular sieves, 170 °C, Ar, 12 h | 0.6 mmol N <sub>2</sub> H <sub>4</sub> ·H <sub>2</sub> O            | 71 % aniline                                         | 12         |
|                                        | Pd/C                                                               | 0.2 mmol phenol, 7 mol % cat. 6 equiv HCO <sub>2</sub> Na, 0.8 mL toluene, 100 °C, Ar, 24 h                                         | 0.2 mmol p-toluidine                                                | 95 % N-cyclohexyl-4-methylaniline                    | 13         |
|                                        | Pd/C                                                               | 0.2 mmol phenol, 0.28 mmol cat. (10 mol %), 1.5 equiv HCO <sub>2</sub> Na, 0.5 equiv TFA, 1 mL toluene, 140 °C, Ar, 12 h            | 0.2 mmol octylamine                                                 | 86 % N-octyl aniline                                 | 14         |

|             |                                                                       |                                                                                    |                                                     |                         |    |
|-------------|-----------------------------------------------------------------------|------------------------------------------------------------------------------------|-----------------------------------------------------|-------------------------|----|
| <b>C-OH</b> | 3 wt. % Ru/CNT                                                        | 0.5 mmol lactic acid, 50 mg cat., 1 MPa H <sub>2</sub> , 220 °C, 2 h               | 2.5 mL NH <sub>3</sub> ·H <sub>2</sub> O (25 wt. %) | 62 % alanine            | 15 |
|             | 10 wt. % Ni/θ-Al <sub>2</sub> O <sub>3</sub>                          | 4 g o-xylene, 3.0 mmol alcohol, 0.5 mmol n-dodecane, 160 °C, 4 h                   | 0.4 MPa NH <sub>3</sub>                             | 66.4 % 2-octylamine     | 16 |
|             | 1 % Pt, 1 % Co/CeO <sub>2</sub>                                       | 5 mL p-xylene, 2 mmol cyclopentanol, 50 mg cat. 160 °C, 4 h                        | 0.35 MPa NH <sub>3</sub>                            | 67.4 % Cyclopentylamine | 17 |
|             | 2.2 wt. % Ru(OH)x/TiO <sub>2</sub>                                    | 2.5 mmol benzyl alcohol, Ru: 0.015 mmol, 0.5 mL mesitylene, 141 °C, 12 h, 1 atm Ar | 0.25 mmol urea                                      | 93 % tribenzylamine     | 18 |
|             | 65 wt. % Ni/Al <sub>2</sub> O <sub>3</sub> -SiO <sub>2</sub> (200 mg) | alcohol (0.5 mmol), t-amyl alcohol (3 mL), 160 °C, 18 h. IS: Dodecane              | aq. NH <sub>3</sub> (25 wt. %, 0.4 mL)              | 58 %                    | 19 |

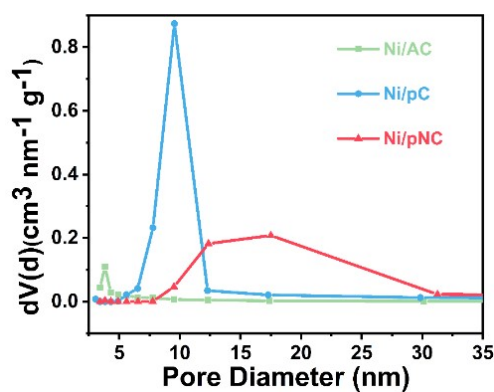

Fig. S1 Pore size distribution of Ni/AC, Ni/pC and Ni/pNC.

### Procedure for isolation and identification of products

A small amount of sample points were dipped into the TLC plate with a capillary tube, and the TLC plate was put into the prepared developing solvent (PE:EA= 2:1) for TLC detection, so that various components in the mixture moved to the corresponding position with the developing solvent, as shown in Fig. S2. The TLC plate was irradiated under an ultraviolet lamp to determine the product point in the desired sample. After determining the sample point, the mixture sample was spread on the PTLC plate at a position higher than the eluent liquid surface, and a horizontal sample band was formed under the irradiation of UV lamp. After drying, each ribbon carrying different compounds was scraped off the plate and extracted and washed with ethyl acetate to obtain filtrate, and then the solvent was removed to obtain pure compounds. The yield and purity of the products obtained were shown in the Table S2. Finally, the compound was dissolved in DMSO- $d_6$  and loaded into nuclear magnetic tube for nuclear magnetic testing, the  $^1\text{H}$  NMR spectra were showed in Fig. S3-Fig. S5.

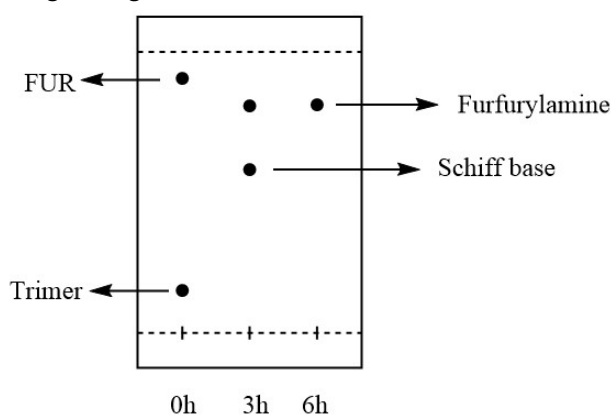

Fig. S2 TLC detection of mixed sample solution at different reaction time.

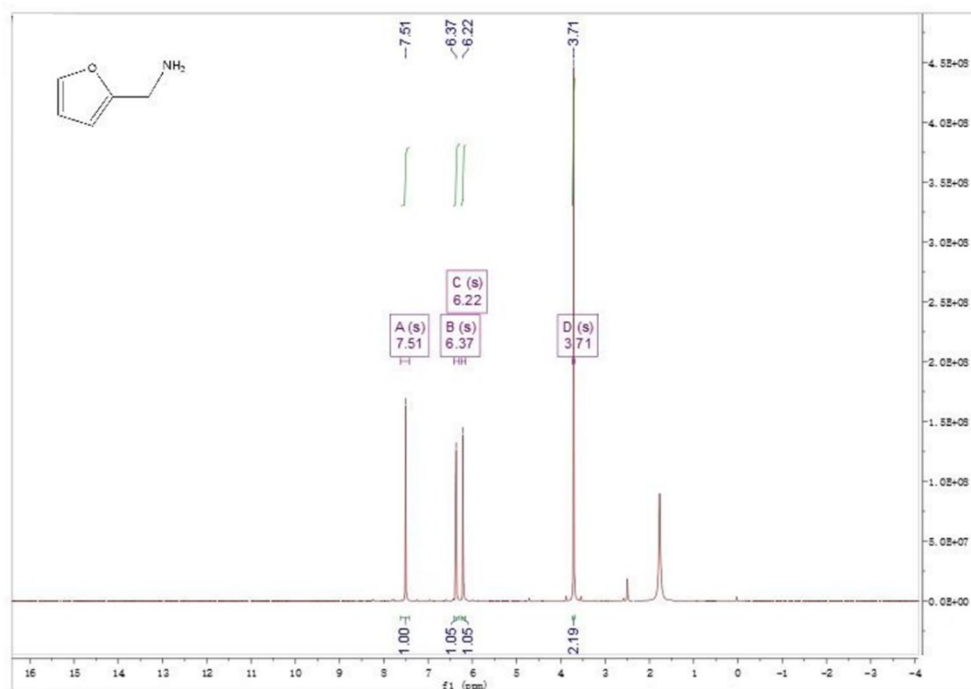

Fig. S3  $^1\text{H}$  NMR spectrum (400 MHz, DMSO- $d_6$ ) of isolated furfuryl amine (96 % yield at 6 h).  $\delta$  7.51 (s, 1H, 2-furan), 6.37 (s, 1H, 2-furan), 6.22 (s, 1H, 2-furan), 3.71 (s, 2H, methylene).

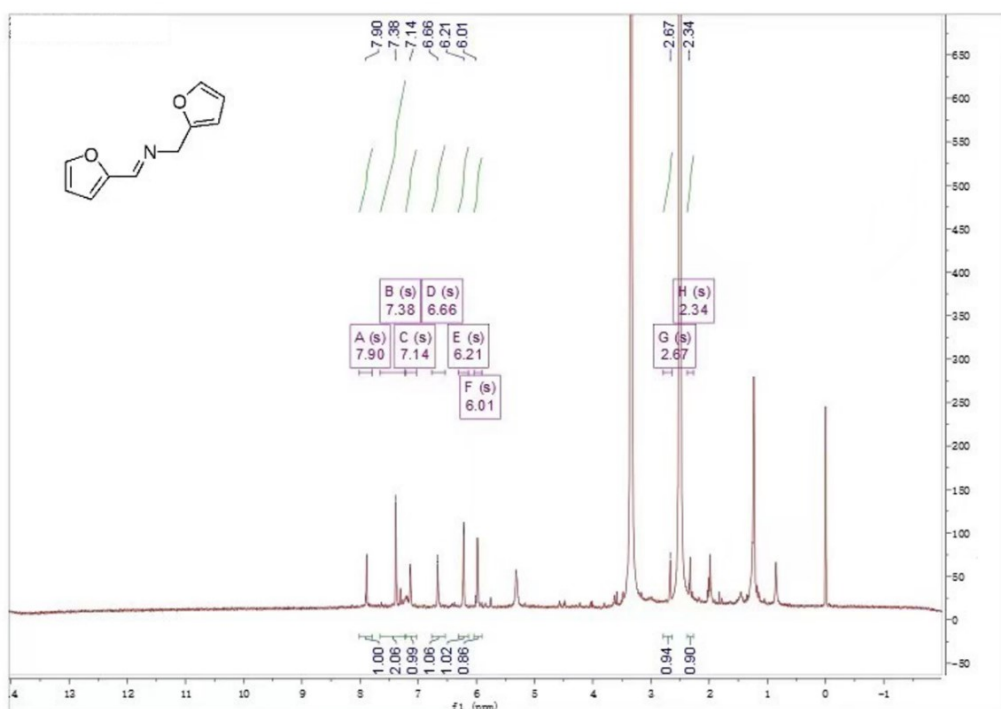

Fig. S4  $^1\text{H}$  NMR spectrum (400 MHz,  $\text{DMSO}-d_6$ ) of isolated Schiff base (60 % yield at 3 h).  $\delta$  7.90 (s, 1H, 2-furan), 7.38 (s, 2H, 2-furan), 7.14 (s, 1H, 2-furan), 6.66 (s, 1H, 2-furan), 6.21 (s, 1H, 2-furan), 6.01 (s, 1H, 2-furan), 2.67 (s, 1H, aldimine), 2.34 (s, 1H, methylene).

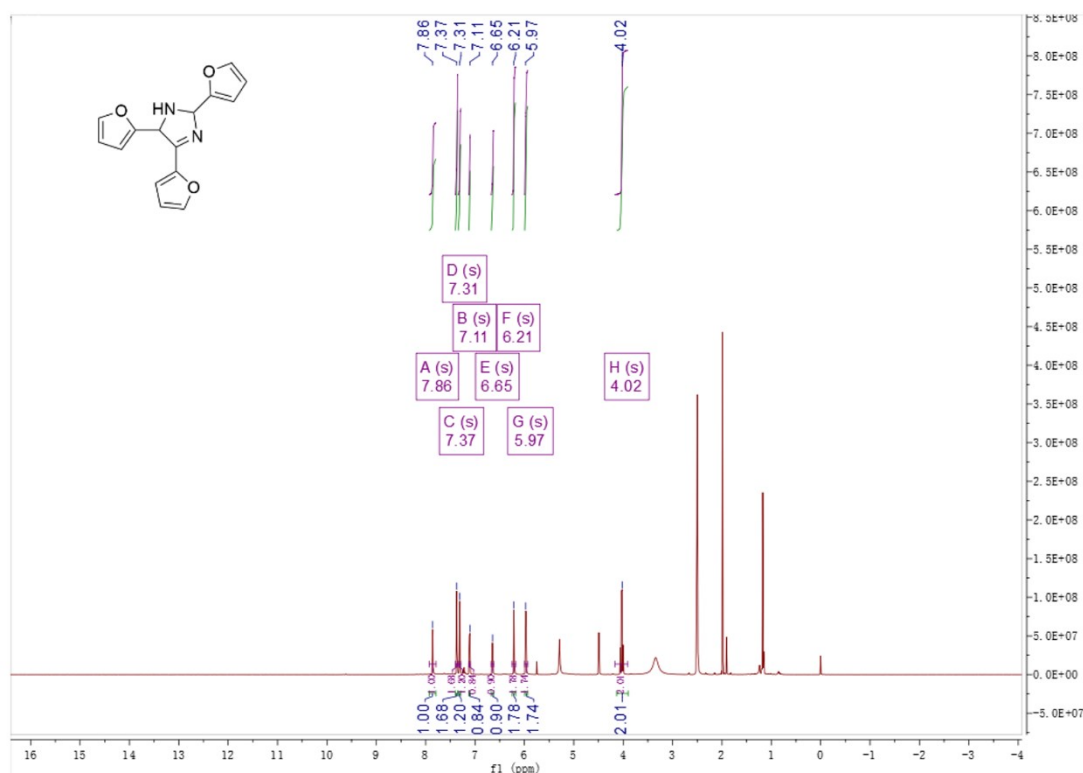

Fig. S5  $^1\text{H}$  NMR spectrum (400 MHz,  $\text{DMSO}-d_6$ ) of isolated trimer (72 % yield at 0 h).  $\delta$  7.86 (s, 1H, amine), 7.37 (s, 2H, 2-furan), 7.31 (s, 1H, 2-furan), 7.11 (s, 1H, 2-furan), 6.65 (s, 1H, 2-furan), 6.21 (s, 2H, 2-furan), 5.97 (s, 2H, 2-furan), 4.02 (s, 2H, methine).

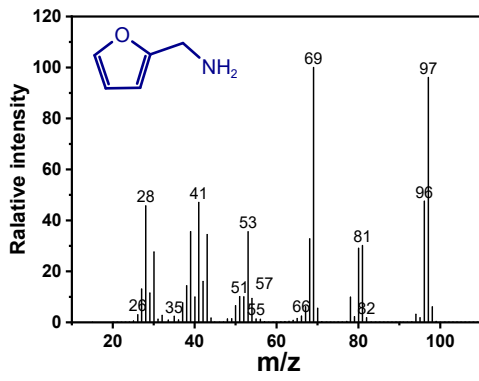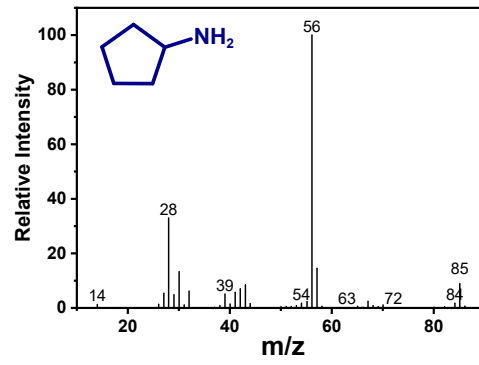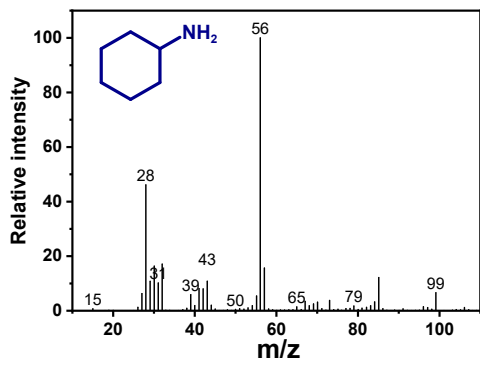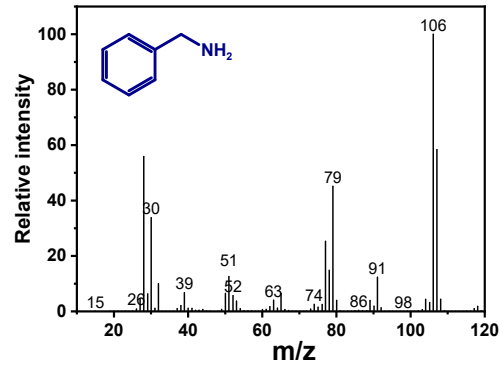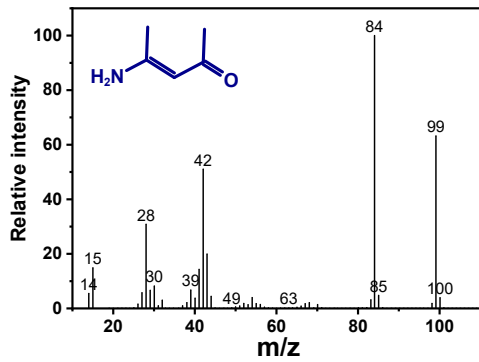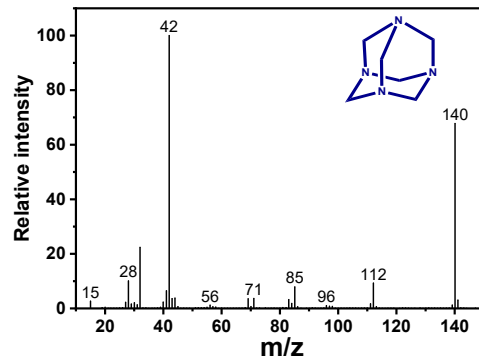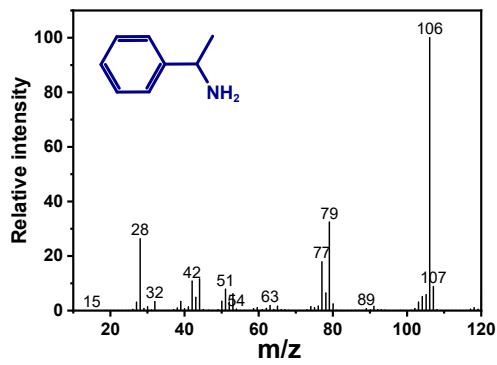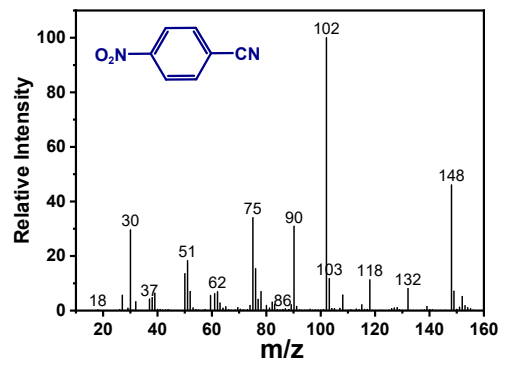

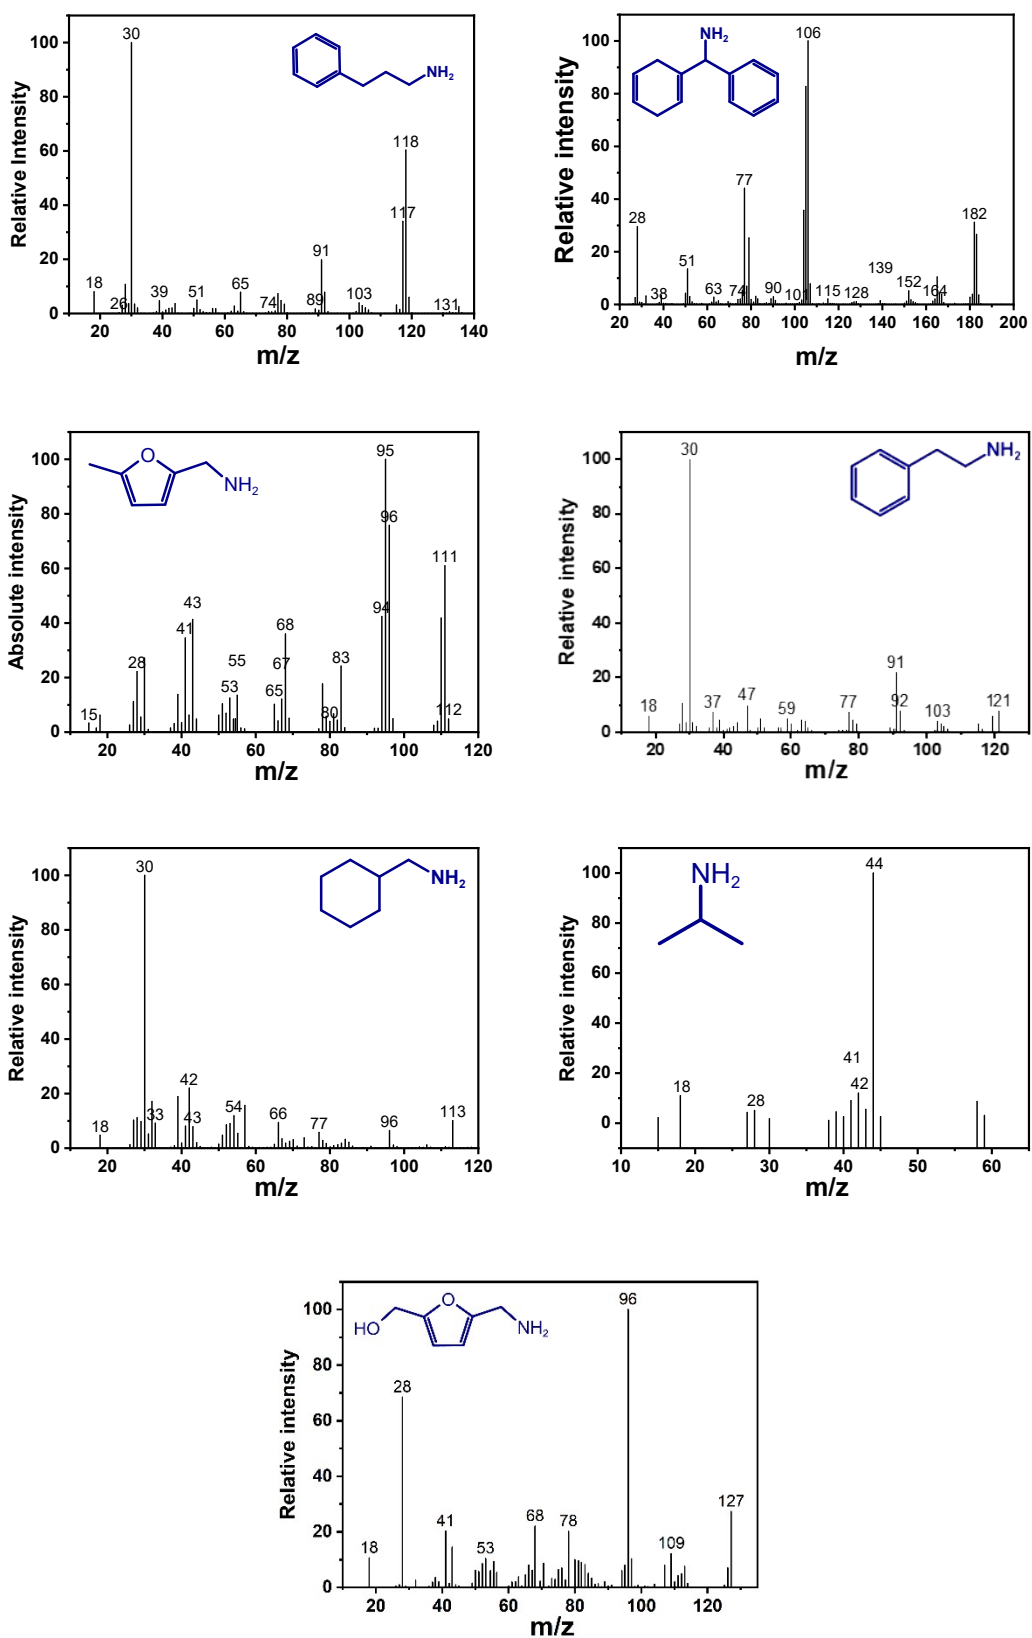

Fig. S6 MS spectra of the products for the reductive amination of various aldehydes and ketones catalyzed by Ni/pNC catalyst.



## Notes and references

1. R. Jagadeesh, K. Murugesan and M. Beller, *Angew. Chem.*, 2019, **58**, 5064.
2. R. V. Jagadeesh, K. Murugesan, A. S. Alshammari, H. Neumann, M. M. Pohl, J. Radnik and M. Beller, *Science*, 2017, **358**, 326.
3. G. Hahn, P. Kunas, N. de Jonge and R. Kempe, *Nat. Catal.*, 2019, **2**, 71.
4. C. Xie, J. Song, M. Hua, Y. Hu, X. Huang, H. Wu, G. Yang and B. Han, *ACS Catal.*, 2020, **10**, 7763.
5. C. Xie, J. Song, H. Wu, Y. Hu, H. Liu, Z. Zhang, P. Zhang, B. Chen and B. Han, *J. Am. Chem. Soc.*, 2019, **141**, 4002.
6. Tasuku, Komanoya, Takashi, Kinemura, Yusuke, Kita, Keigo, Kamata, Michikazu and Hara, *J. Am. Chem. Soc.*, 2017, **139**, 11439.
7. B. Dong, X. Guo, B. Zhang, X. Chen, J. Guan, Y. Qi, S. Han and X. Mu, *Catalysts*, 2015, **5**, 2258.
8. D. Deng, Y. Kita, K. Kamata and M. Hara, *ACS Sustainable Chem. Eng.*, 2019, **7**, 4692.
9. G. Liang, A. Wang, L. Li, G. Xu, N. Yan and T. Zhang, *Angew. Chem.*, 2017, **129**, 3096.
10. C. P. Wong, T. Awakawa, Y. Nakashima, T. Mori, Q. Zhu, X. Liu and I. Abe, *Angew Chem Int Ed Engl*, 2018, **57**, 560.
11. D. Cao, H. Zeng and C.-J. Li, *ACS Catal.*, 2018, **8**, 8873.
12. Z. Qiu, L. Lv, J. Li, C. C. Li and C. J. Li, *Chem. Sci.*, 2019, **10**, 4775.
13. Z. Chen, H. Zeng, H. Gong, H. Wang and C. J. Li, *Chem. Sci.*, 2015, **46**, 4174.
14. Z. Chen, H. Zeng, S. A. Girard, F. Wang, N. Chen and C. Li, *Angew. Chem. Int. Ed.*, 2015, **54**, 14487.
15. Y. W. S. Z. Weiping Deng, and Ning Yan, *PNAS*, , 2018, **115**, 5093.
16. K.-i. Shimizu, K. Kon, W. Onodera, H. Yamazaki and J. N. Kondo, *ACS Catal.*, 2013, **3**, 112.
17. T. A. Tao, A. Wg, A. Xl, G. A. Yong, B. Cwp, B. Jlc, C. Yh and A. Yw, *Journal of Catalysis*, 2019, **378**, 392.
18. J. He, J. W. Kim, K. Yamaguchi and N. Mizuno, *Angew. Chem. Int. Ed.*, 2009, **48**, 9888.
19. Y. Liu, A. Afanasenko, S. Elangovan, Z. Sun and K. Barta, *ACS Sustainable Chem. Eng.*, , 2019, **7**, 11267.
